# Supplementary material
Source: publisher site journal article supplement (https://www.dovepress.com/article/406703)
Supplement: Supplementary file 1 [file get_supplementary_file.php]

**Supplementary Material**

**Synthesis of Amino Acids bearing Halodifluoromethyl Moieties and their Application to p53-derived Peptides Binding to Mdm2/Mdm4**

S. Vaas1, M. O. Zimmermann1, T. Klett1, F. M. Boeckler1,2

† Laboratory for Molecular Design and Pharmaceutical Biophysics, Institute of Pharmaceutical Sciences, Department of Pharmacy and Biochemistry, Eberhard Karls Universität Tübingen, 72076 Tübingen, Germany

2 Institute for Bioinformatics and Medical Informatics (IBMI), Eberhard Karls Universität Tübingen, 72076 Tübingen, Germany

*To whom correspondence should be addressed. E-mail: frank.boeckler@uni-tuebingen.de

**Content**

[**Competitive Fluorescence Polarization Assay** 2](#_Toc126003632)

[**Synthesized Peptides** 3](#_Toc126003633)

[**CD Spectroscopy** 4](#_Toc126003634)

[**Geometry Optimization of Modified p53 Peptide** 5](#_Toc126003635)

**Competitive Fluorescence Polarization Assay**


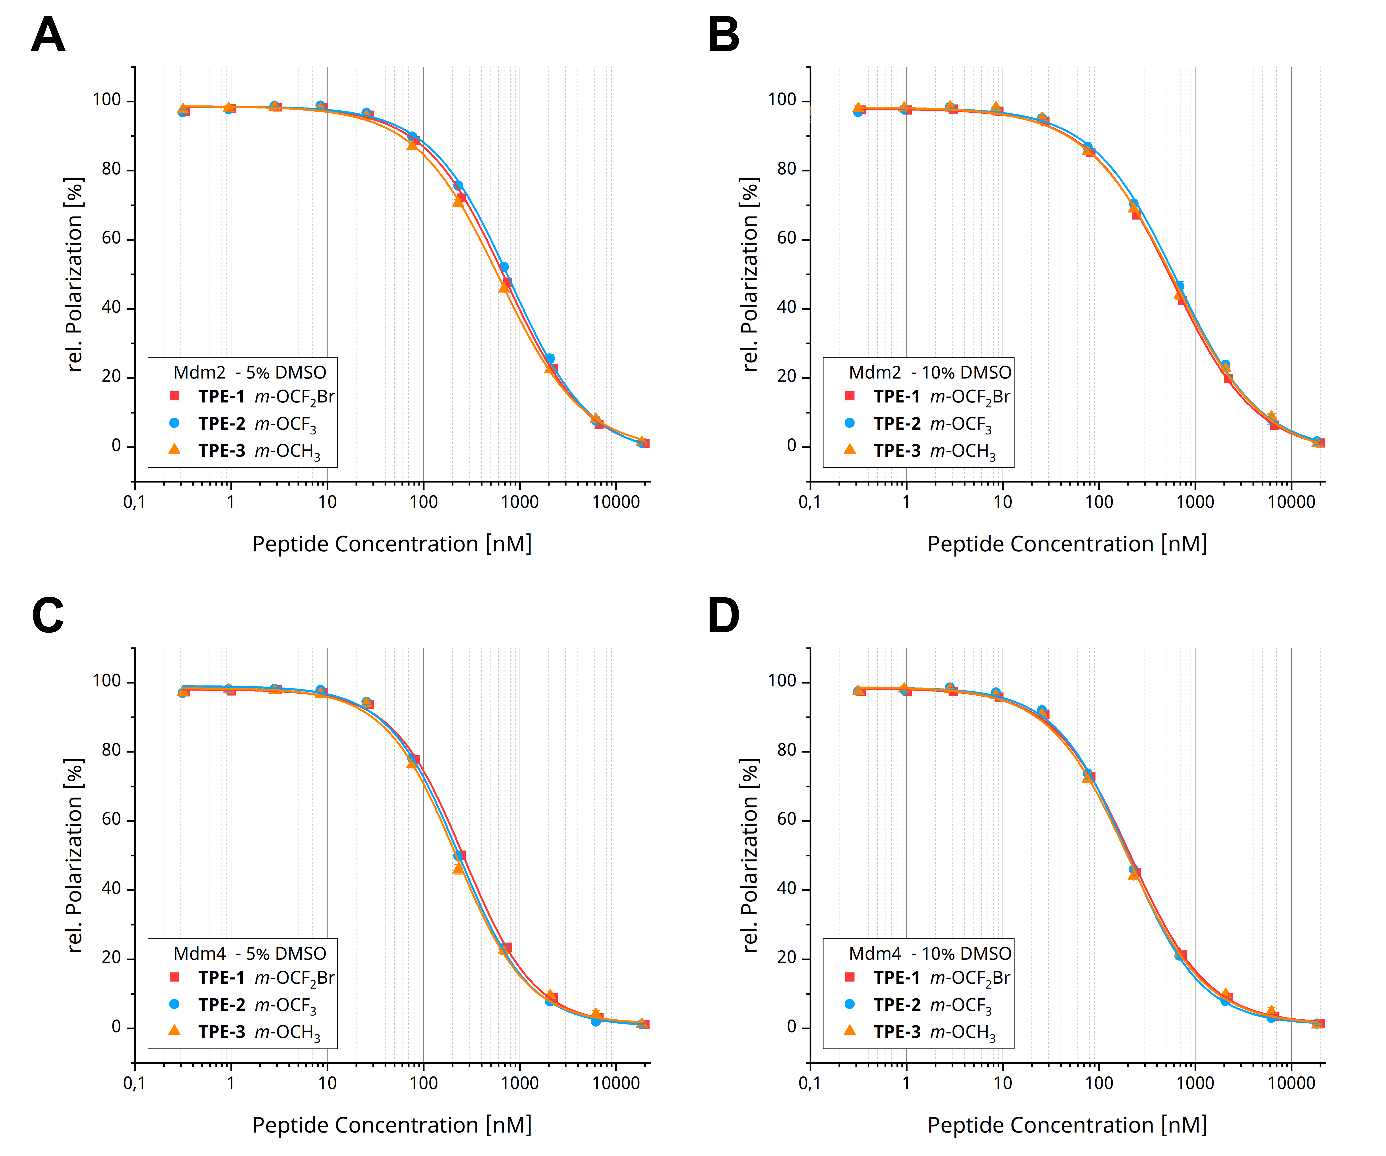
**Figure S1. A-D,** relative fluorescence polarization in [%] of competitive fluorescence polarization assay for TPE-1, TPE-2 and TPE-3 with 20 nM fluorescence-labeled probe and 30 nM Mdm2 (KD = 14.3 nM) or 60 nM Mdm4 (KD = 38.2 nM), measured in 5% or 10% DMSO. Measurement series are shown as mean ±SD (each measuring point as quadruplicate; number of measurement series: n=3).

**Synthesized Peptides**

**Table S1.** Synthesized peptide sequences and the corresponding HR-MS data.

| entry | peptide sequence | **X** | x | [M+xH]x+(calc.) [*m/z*] | [M+xH]x+ [*m/z*] | rel. Δm [ppm] |
| --- | --- | --- | --- | --- | --- | --- |
|
| probe | FAM-LTFEHYWAQLTS-CONH2 |  | 3 | 618.2666 | 618.26669 | 0.5 |
| TPE-1 | H2N-TSFAE**X**WALLSP-CONH2 | Phe(*m*-OCF2Br) | 1 | 1511.6016 | 1511.6020 | 0.3 |
| TPE-2 | H2N-TSFAE**X**WALLSP-CONH2 | Phe(*m*-OCF3) | 2 | 726.3445 | 726.3444 | 0.2 |
| TPE-3 | H2N-TSFAE**X**WALLSP-CONH2 | Phe(*m*-OCH3) | 2 | 699.3586 | 699.3593 | 0.9 |
| TPA-1  (17-28p53) | H2N-ETFSDLW**X**LLPE-CONH2 | Lys | 2 | 738.8903 | 738.8889 | 1.9 |
| TPA-2 | H2N-ETFSDLW**X**LLPE-CONH2 | Nle(εNHCOCH3) | 2 | 759.8956 | 759.8947 | 1.1 |
| TPA-3 | H2N-ETFSDLW**X**LLPE-CONH2 | Nle(εNHCOCF3) | 2 | 777.8862 | 777.8856 | 0.8 |
| TPA-4 | H2N-ETFSDLW**X**LLPE-CONH2 | Nle(εNHCOCF2H) | 2 | 786.8814 | 786.8825 | 1.3 |
| TPA-5 | H2N-ETFSDLW**X**LLPE-CONH2 | Nle(εNHCOCF2Cl) | 2 | 794.8667 | 794.8650 | 2.1 |
| TPA-6 | H2N-ETFSDLW**X**LLPE-CONH2 | Nle(εNHCOCF2Br) | 1 | 1632.6755 | 1632.6754 | 0.1 |
| TPA-7 | H2N-ETFSDLW**X**LLPE-CONH2 | Dab | 2 | 724.8746 | 724.8739 | 1.0 |
| TPA-8 | H2N-ETFSDLW**X**LLPE-CONH2 | Abu(γNHCOCH3) | 2 | 745.8799 | 745.8787 | 1.6 |
| TPA-9 | H2N-ETFSDLW**X**LLPE-CONH2 | Abu(γNHCOCF3) | 2 | 763.8705 | 763.8686 | 2.5 |
| TPA-10 | H2N-ETFSDLW**X**LLPE-CONH2 | Abu(γNHCOCF2H) | 2 | 772.8658 | 772.8645 | 1.7 |
| TPA-11 | H2N-ETFSDLW**X**LLPE-CONH2 | Abu(γNHCOCF2Cl) | 2 | 780.8510 | 780.8506 | 0.5 |
| TPA-12 | H2N-ETFSDLW**X**LLPE-CONH2 | Abu(γNHCOCF2Br) | 2 | 802.8258 | 802.8245 | 1.6 |

**CD Spectroscopy**

**
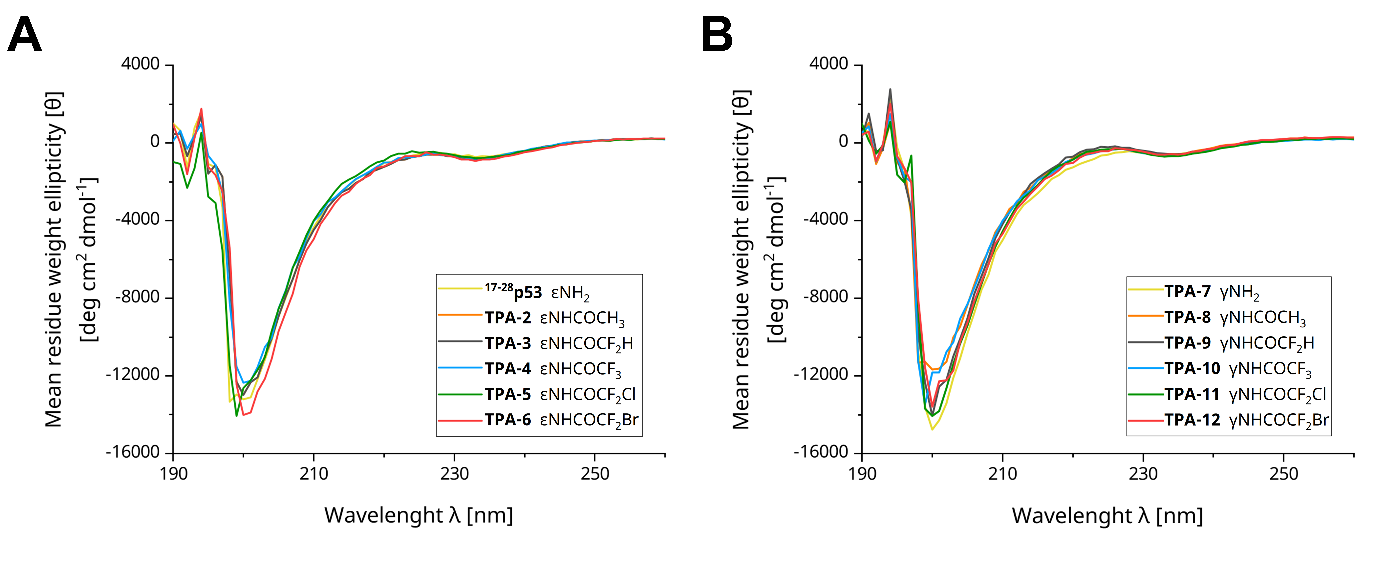
Figure S2.** **A**, CD spectra of TPA-1 (17-28p53) and TPA-2 to TPA-6. **B**, CD spectra of TPA-7 to TPA-12. All spectra show intrinsically disordered peptides at a concentration of 150 µM in PBS (pH 7.4) at 20°C.

**Geometry Optimization of Modified p53 Peptide**

**Table S2.** XB results from geometry optimization using TPSS(D3)/SV(P) of p53 peptide with bromodifluoroacetylated Lys24 side chain (PDB: 2Z5T). The parameters for a positive XB match were a distance of <4 Å and an angle of >160°. Fused_92_red_240.pdb (#33) already starts with the XB. Matches with concurrent interaction of at least one fluorine atom are highlighted in blue. Matches with concurrent H∙∙∙O(amide) contact are highlighted in green.

| **#** | **system** | **distance**  **[Å]** | **angle**  **[°]** | **pep_prot** | **id** | **atom** | **atom and amino acid** |
| --- | --- | --- | --- | --- | --- | --- | --- |
| 1 | fused_2_rot_300.pdb | 3.00 | 164.16 | peptide | 98 | O | Side chain O of Ser20 |
| 2 | fused_31_rot_300.pdb | 3.01 | 163.38 | peptide | 98 | O |  |
| 3 | fused_106_rot_180.pdb | 2.93 | 161.68 | peptide | 105 | O | Side chain O of Asp21 |
| 4 | fused_44_rot_330.pdb | 2.72 | 171.82 | peptide | 105 | O |  |
| 5 | fused_72_rot_300.pdb | 2.91 | 162.24 | peptide | 105 | O |  |
| 6 | fused_19_rot_0.pdb | 2.67 | 176.64 | peptide | 106 | O | Side chain O of Asp21 |
| 7 | fused_20_rot_180.pdb | 3.00 | 169.64 | peptide | 106 | O |  |
| 8 | fused_4_rot_210.pdb | 2.64 | 173.25 | peptide | 106 | O |  |
| 9 | fused_77_rot_300.pdb | 2.97 | 164.83 | peptide | 106 | O |  |
| 10 | fused_77_rot_330.pdb | 2.97 | 164.72 | peptide | 106 | O |  |
| 11 | fused_78_rot_240.pdb | 2.71 | 179.15 | peptide | 106 | O |  |
| 12 | fused_83_rot_270.pdb | 3.15 | 161.62 | peptide | 106 | O |  |
| 13 | fused_75_rot_240.pdb | 3.37 | 171.65 | peptide | 130 | N | Prot N of Trp23 |
| 14 | fused_103_rot_240.pdb | 2.95 | 160.34 | peptide | 199 | O | Backbone O of Ser20 |
| 15 | fused_37_rot_240.pdb | 3.03 | 175.58 | peptide | 199 | O |  |
| 16 | fused_12_rot_210.pdb | 2.88 | 173.67 | peptide | 204 | O | Backbone O of Asp21 |
| 17 | fused_12_rot_240.pdb | 2.87 | 173.55 | peptide | 204 | O |  |
| 18 | fused_1_rot_210.pdb | 2.87 | 173.83 | peptide | 204 | O |  |
| 19 | fused_1_rot_240.pdb | 2.88 | 173.78 | peptide | 204 | O |  |
| 20 | fused_101_rot_0.pdb | 2.86 | 165.91 | peptide | 219 | O | Backbone O of Lys24 |
| 21 | fused_101_rot_330.pdb | 2.87 | 165.93 | peptide | 219 | O |  |
| 22 | fused_94_rot_0.pdb | 2.89 | 166.06 | peptide | 219 | O |  |
| 23 | fused_99_rot_330.pdb | 2.88 | 165.71 | peptide | 219 | O |  |
| 24 | fused_112_rot_240.pdb | 3.09 | 164.62 | protein | 27 | N | Unprot Side chain N of |
| 25 | fused_131_rot_240.pdb | 2.85 | 167.36 | protein | 27 | N | His51 |
| 26 | fused_31_rot_270.pdb | 3.03 | 165.75 | protein | 27 | N |  |
| 27 | fused_47_rot_240.pdb | 2.97 | 170.58 | protein | 27 | N |  |
| 28 | fused_57_rot_330.pdb | 2.79 | 173.00 | protein | 27 | N |  |
| 29 | fused_62_rot_240.pdb | 2.80 | 166.68 | protein | 27 | N |  |
| 30 | fused_66_rot_330.pdb | 2.88 | 174.49 | protein | 27 | N |  |
| 31 | fused_67_rot_240.pdb | 2.89 | 172.65 | protein | 27 | N |  |
| 32 | fused_75_rot_270.pdb | 3.08 | 168.83 | protein | 27 | N |  |
| 33 | fused_92_rot_240.pdb | 2.82 | 174.29 | protein | 27 | N |  |
| 34 | fused_77_rot_240.pdb | 3.11 | 175.51 | protein | 52 | O | Side chain O of Gln55 |
| 35 | fused_131_rot_300.pdb | 2.86 | 171.26 | protein | 153 | O | Backbone O of His51 |
| 36 | fused_159_rot_240.pdb | 3.98 | 160.67 | protein | 170 | N | Backbone N of Gln55 |

**Table S3.** XB results from geometry optimization using TPSS(D3)/SV(P) of p53 peptide with bromodifluoroacetylated Lys24 side chain (PDB: 3DAB). The parameters for a positive XB match were a distance of <4 Å and an angle of >160°. Matches with concurrent interaction of at least one fluorine atom are highlighted in blue. Matches with concurrent H∙∙∙O(amide) contact are highlighted in green.

| **#** | **system** | **distance**  **[Å]** | **angle**  **[°]** | **pep_prot** | **id** | **atom** | **atom and amino acid** |
| --- | --- | --- | --- | --- | --- | --- | --- |
| 1 | fused_27_rot_210.pdb | 2.72 | 170.45 | peptide | 84 | O | side chain O of |
| 2 | fused_27_rot_330.pdb | 2.70 | 161.25 | peptide | 84 | O | Asp21 |
| 3 | fused_77_rot_180.pdb | 2.72 | 170.09 | peptide | 84 | O |  |
| 4 | fused_81_rot_180.pdb | 2.86 | 163.21 | peptide | 84 | O |  |
| 5 | fused_81_rot_210.pdb | 2.86 | 163.22 | peptide | 84 | O |  |
| 6 | fused_11_rot_270.pdb | 2.69 | 176.68 | peptide | 85 | O | side chain O of |
| 7 | fused_18_rot_270.pdb | 2.72 | 173.10 | peptide | 85 | O | Asp21 |
| 8 | fused_18_rot_300.pdb | 2.71 | 173.24 | peptide | 85 | O |  |
| 9 | fused_19_rot_0.pdb | 2.68 | 175.62 | peptide | 85 | O |  |
| 10 | fused_19_rot_330.pdb | 2.68 | 175.63 | peptide | 85 | O |  |
| 11 | fused_20_rot_180.pdb | 2.69 | 170.88 | peptide | 85 | O |  |
| 12 | fused_20_rot_210.pdb | 2.69 | 170.92 | peptide | 85 | O |  |
| 13 | fused_23_rot_210.pdb | 2.89 | 169.36 | peptide | 85 | O |  |
| 14 | fused_23_rot_240.pdb | 2.90 | 167.52 | peptide | 85 | O |  |
| 15 | fused_24_rot_330.pdb | 2.74 | 170.05 | peptide | 85 | O |  |
| 16 | fused_27_rot_0.pdb | 2.74 | 161.10 | peptide | 85 | O |  |
| 17 | fused_28_rot_180.pdb | 2.72 | 175.89 | peptide | 85 | O |  |
| 18 | fused_28_rot_210.pdb | 2.73 | 175.53 | peptide | 85 | O |  |
| 19 | fused_33_rot_210.pdb | 2.73 | 162.01 | peptide | 85 | O |  |
| 20 | fused_3_rot_0.pdb | 2.64 | 172.93 | peptide | 85 | O |  |
| 21 | fused_4_rot_180.pdb | 2.70 | 168.69 | peptide | 85 | O |  |
| 22 | fused_77_rot_300.pdb | 2.65 | 179.56 | peptide | 85 | O |  |
| 23 | fused_77_rot_330.pdb | 2.74 | 161.06 | peptide | 85 | O |  |
| 24 | fused_78_rot_210.pdb | 2.72 | 175.81 | peptide | 85 | O |  |
| 25 | fused_78_rot_240.pdb | 2.73 | 175.75 | peptide | 85 | O |  |
| 26 | fused_26_rot_240.pdb | 3.24 | 160.78 | peptide | 97 | N | side chain N of Trp23 |
| 27 | fused_103_rot_240.pdb | 2.76 | 162.81 | peptide | 166 | O | BB O of Ser20 |
| 28 | fused_135_rot_330.pdb | 2.97 | 163.90 | peptide | 171 | O | BB O of Asp21 |
| 29 | fused_1_rot_210.pdb | 2.83 | 177.04 | peptide | 171 | O |  |
| 30 | fused_1_rot_240.pdb | 2.73 | 173.17 | peptide | 171 | O |  |
| 31 | fused_1_rot_270.pdb | 2.83 | 178.50 | peptide | 171 | O |  |
| 32 | fused_1_rot_300.pdb | 2.83 | 178.51 | peptide | 171 | O |  |
| 33 | fused_68_rot_300.pdb | 2.98 | 163.84 | peptide | 171 | O |  |
| 34 | fused_70_rot_300.pdb | 2.78 | 164.53 | peptide | 171 | O |  |
| 35 | fused_82_rot_0.pdb | 2.90 | 164.36 | peptide | 171 | O |  |
| 36 | fused_97_rot_330.pdb | 3.01 | 163.66 | peptide | 171 | O |  |
| 37 | fused_101_rot_0.pdb | 3.12 | 165.82 | peptide | 186 | O | BB O of Lys24 |
| 38 | fused_101_rot_330.pdb | 3.17 | 165.51 | peptide | 186 | O |  |
| 39 | fused_90_rot_0.pdb | 3.15 | 165.71 | peptide | 186 | O |  |
| 40 | fused_94_rot_0.pdb | 3.06 | 165.71 | peptide | 186 | O |  |
| 41 | fused_99_rot_330.pdb | 3.16 | 165.72 | peptide | 186 | O |  |
| 42 | fused_14_rot_330.pdb | 3.13 | 164.02 | protein | 27 | N | side chain N of His54 |
| 43 | fused_156_rot_240.pdb | 2.82 | 169.21 | protein | 27 | N |  |
| 44 | fused_31_rot_240.pdb | 2.91 | 173.08 | protein | 27 | N |  |
| 45 | fused_56_rot_240.pdb | 2.94 | 170.21 | protein | 27 | N |  |
| 46 | fused_66_rot_330.pdb | 2.87 | 174.62 | protein | 27 | N |  |
| 47 | fused_88_rot_270.pdb | 2.91 | 171.40 | protein | 27 | N |  |
| 48 | fused_8_rot_270.pdb | 2.94 | 170.16 | protein | 27 | N |  |
| 49 | fused_9_rot_240.pdb | 3.22 | 161.77 | protein | 27 | N |  |
| 50 | fused_112_rot_240.pdb | 3.40 | 166.86 | protein | 45 | N | side chain N of Gln58 |
| 51 | fused_136_rot_330.pdb | 3.03 | 174.28 | protein | 46 | O | side chain O of Gln58 |
| 52 | fused_9_rot_330.pdb | 2.95 | 160.12 | protein | 46 | O |  |
| 53 | fused_26_rot_270.pdb | 3.91 | 161.09 | protein | 116 | O | BB O of Met53 |
| 54 | fused_60_rot_270.pdb | 3.04 | 168.03 | protein | 120 | O | BB O of His54 |

**Table S4.** Other acetyl amide interaction results from geometry optimization using TPSS(D3)/SV(P) of p53 peptide with bromodifluoroacetylated Lys24 side chain (PDB ID: 2Z5T). Matches with an XB-positive result are highlighted in yellow.

| **#** | **system** | **peptide donor/acceptor** | **distance**  **[Å]** | **angle**  **[°]** |
| --- | --- | --- | --- | --- |
|  | **unpolar** |  | <3.0 Å | >150° |
| 1 | fused_100_rot_210.pdb | F | 2.56 | 157.61 |
| 2 | fused_103_rot_240.pdb | F | 2.29 | 158.30 |
| 3 | fused_104_rot_240.pdb | F | 2.99 | 151.90 |
| 4 | fused_104_rot_240.pdb | F | 2.50 | 158.72 |
| 5 | fused_106_rot_210.pdb | F | 2.84 | 168.99 |
| 6 | fused_125_rot_300.pdb | F | 2.85 | 158.92 |
| 7 | fused_158_rot_0.pdb | F | 2.68 | 164.16 |
| 8 | fused_15_rot_240.pdb | F | 2.86 | 154.06 |
| 9 | fused_15_rot_270.pdb | F | 2.88 | 154.72 |
| 10 | fused_16_rot_270.pdb | F | 2.86 | 151.71 |
| 11 | fused_17_rot_300.pdb | F | 2.51 | 151.15 |
| 12 | fused_1_rot_0.pdb | F | 2.50 | 166.98 |
| 13 | fused_2_rot_300.pdb | F | 2.98 | 152.99 |
| 14 | fused_30_rot_240.pdb | F | 2.75 | 153.82 |
| 15 | fused_30_rot_270.pdb | F | 2.93 | 156.24 |
| 16 | fused_31_rot_300.pdb | F | 2.39 | 158.15 |
| 17 | fused_40_rot_330.pdb | F | 2.44 | 175.36 |
| 18 | fused_59_rot_0.pdb | F | 2.74 | 155.40 |
| 19 | fused_63_rot_330.pdb | F | 2.38 | 152.15 |
| 20 | fused_73_rot_270.pdb | F | 2.76 | 153.44 |
| 21 | fused_75_rot_270.pdb | F | 2.43 | 156.48 |
| 22 | fused_7_rot_330.pdb | F | 2.74 | 162.97 |
| 23 | fused_87_rot_0.pdb | F | 2.38 | 151.83 |
| 24 | fused_87_rot_330.pdb | F | 2.38 | 151.64 |
| 25 | fused_89_rot_210.pdb | F | 2.90 | 156.15 |
| 26 | fused_92_rot_240.pdb | F | 2.30 | 170.07 |
| 27 | fused_93_rot_240.pdb | F | 2.97 | 166.51 |
| 28 | fused_93_rot_240.pdb | F | 2.56 | 157.75 |
| 29 | fused_9_rot_330.pdb | F | 2.83 | 165.29 |
|  |  |  |  |  |
|  | **polar** |  | <3.0 Å | >150° |
| 1 | used_106_rot_180.pdb | F | 2.03 | 162.49 |
| 2 | fused_17_rot_210.pdb | F | 2.70 | 150.61 |
| 3 | fused_90_rot_180.pdb | F | 1.98 | 163.97 |
| 4 | fused_9_rot_210.pdb | F | 2.68 | 150.79 |
|  |  |  |  |  |
|  | **amide O** |  | <3.5 Å | >150° |
| 1 | fused_125_rot_300.pdb | O | 1.93 | 168.35 |
| 2 | fused_12_rot_0.pdb | O | 1.76 | 171.05 |
| 3 | fused_131_rot_300.pdb | O | 1.89 | 172.27 |
| 4 | fused_156_rot_180.pdb | O | 1.76 | 162.67 |
| 5 | fused_156_rot_210.pdb | O | 1.75 | 174.46 |
| 6 | fused_156_rot_240.pdb | O | 1.74 | 175.96 |
| 7 | fused_15_rot_240.pdb | O | 1.78 | 171.45 |
| 8 | fused_15_rot_270.pdb | O | 1.78 | 170.80 |
| 9 | fused_161_rot_240.pdb | O | 1.85 | 170.88 |
| 10 | fused_161_rot_270.pdb | O | 1.85 | 170.96 |
| 11 | fused_19_rot_270.pdb | O | 1.90 | 172.88 |
| 12 | fused_20_rot_180.pdb | O | 1.79 | 179.67 |
| 13 | fused_20_rot_210.pdb | O | 1.88 | 161.94 |
| 14 | fused_20_rot_240.pdb | O | 2.00 | 160.77 |
| 15 | fused_21_rot_0.pdb | O | 1.70 | 174.79 |
| 16 | fused_21_rot_330.pdb | O | 1.81 | 164.25 |
| 17 | fused_23_rot_240.pdb | O | 1.90 | 172.20 |
| 18 | fused_24_rot_240.pdb | O | 1.80 | 165.02 |
| 19 | fused_27_rot_0.pdb | O | 1.74 | 179.59 |
| 20 | fused_43_rot_240.pdb | O | 1.79 | 170.55 |
| 21 | fused_44_rot_330.pdb | O | 1.71 | 168.76 |
| 22 | fused_69_rot_300.pdb | O | 1.78 | 167.79 |
| 23 | fused_77_rot_300.pdb | O | 1.80 | 162.89 |
| 24 | fused_77_rot_330.pdb | O | 1.78 | 162.15 |
| 25 | fused_7_rot_0.pdb | O | 1.73 | 173.70 |
|  |  |  |  |  |
|  | **amide NH** |  | <3.5 Å | >150° |
| 1 | fused_101_rot_300.pdb | NH | 2.06 | 152.64 |
| 2 | fused_151_rot_240.pdb | NH | 1.92 | 152.76 |
| 3 | fused_151_rot_270.pdb | NH | 1.97 | 155.42 |
| 4 | fused_28_rot_210.pdb | NH | 2.06 | 152.89 |
| 5 | fused_78_rot_270.pdb | NH | 2.06 | 152.71 |

**Table S5.** Other acetyl amide interaction results from geometry optimization using TPSS(D3)/SV(P) of p53 peptide with bromodifluoroacetylated Lys24 side chain (PDB ID: 3DAB). Matches with an XB-positive result are highlighted in yellow.

| **#** | **system** | **peptide donor/acceptor** | **distance** | **angle** |
| --- | --- | --- | --- | --- |
| **[Å]** | **[°]** |
|  | **F** |  | <3.0 Å | >150° |
| 1 | fused_100_rot_180.pdb | F | 2.48 | 156.11 |
| 2 | fused_100_rot_180.pdb | F | 2.47 | 176.76 |
| 3 | fused_101_rot_120.pdb | F | 2.92 | 163.38 |
| 4 | fused_103_rot_240.pdb | F | 2.84 | 173.65 |
| 5 | fused_10_rot_300.pdb | F | 2.82 | 158.22 |
| 6 | fused_112_rot_240.pdb | F | 2.70 | 175.99 |
| 7 | fused_123_rot_300.pdb | F | 2.70 | 161.74 |
| 8 | fused_127_rot_330.pdb | F | 2.30 | 165.43 |
| 9 | fused_12_rot_300.pdb | F | 2.58 | 155.29 |
| 10 | fused_134_rot_240.pdb | F | 2.77 | 167.66 |
| 11 | fused_136_rot_330.pdb | F | 2.76 | 156.20 |
| 12 | fused_13_rot_300.pdb | F | 2.85 | 156.40 |
| 13 | fused_152_rot_0.pdb | F | 2.31 | 166.12 |
| 14 | fused_153_rot_0.pdb | F | 2.27 | 166.94 |
| 15 | fused_153_rot_330.pdb | F | 2.28 | 167.62 |
| 16 | fused_156_rot_180.pdb | F | 2.44 | 170.60 |
| 17 | fused_156_rot_210.pdb | F | 2.44 | 169.51 |
| 18 | fused_158_rot_0.pdb | F | 2.69 | 160.86 |
| 19 | fused_158_rot_330.pdb | F | 2.70 | 160.80 |
| 20 | fused_161_rot_180.pdb | F | 2.41 | 160.70 |
| 21 | fused_161_rot_270.pdb | F | 2.48 | 163.76 |
| 22 | fused_17_rot_240.pdb | F | 2.82 | 159.97 |
| 23 | fused_1_rot_0.pdb | F | 2.52 | 167.39 |
| 24 | fused_1_rot_330.pdb | F | 2.50 | 171.20 |
| 25 | fused_30_rot_240.pdb | F | 2.84 | 167.28 |
| 26 | fused_30_rot_270.pdb | F | 2.84 | 165.06 |
| 27 | fused_37_rot_210.pdb | F | 2.57 | 168.36 |
| 28 | fused_43_rot_210.pdb | F | 2.58 | 153.98 |
| 29 | fused_47_rot_270.pdb | F | 2.85 | 169.61 |
| 30 | fused_51_rot_0.pdb | F | 2.31 | 177.37 |
| 31 | fused_51_rot_300.pdb | F | 2.30 | 178.64 |
| 32 | fused_51_rot_330.pdb | F | 2.32 | 177.04 |
| 33 | fused_53_rot_240.pdb | F | 2.53 | 155.31 |
| 34 | fused_53_rot_270.pdb | F | 2.45 | 166.08 |
| 35 | fused_61_rot_330.pdb | F | 2.53 | 156.32 |
| 36 | fused_63_rot_330.pdb | F | 2.74 | 153.93 |
| 37 | fused_64_rot_240.pdb | F | 2.36 | 154.61 |
| 38 | fused_72_rot_300.pdb | F | 2.67 | 156.04 |
| 39 | fused_73_rot_240.pdb | F | 2.85 | 165.72 |
| 40 | fused_73_rot_270.pdb | F | 2.81 | 172.34 |
| 41 | fused_78_rot_180.pdb | F | 2.75 | 172.97 |
| 42 | fused_79_rot_0.pdb | F | 2.43 | 153.64 |
| 43 | fused_81_rot_180.pdb | F | 2.40 | 154.26 |
| 44 | fused_81_rot_210.pdb | F | 2.40 | 154.26 |
| 45 | fused_88_rot_330.pdb | F | 2.61 | 156.27 |
| 46 | fused_89_rot_0.pdb | F | 2.57 | 163.07 |
| 47 | fused_89_rot_210.pdb | F | 2.70 | 157.72 |
| 48 | fused_89_rot_330.pdb | F | 2.58 | 172.30 |
| 49 | fused_90_rot_120.pdb | F | 2.96 | 162.03 |
| 50 | fused_93_rot_240.pdb | F | 2.85 | 156.38 |
|  |  |  |  |  |
|  | **amide NH** |  | <3.5 Å | >150° |
| 1 | fused_119_rot_300.pdb | NH | 2.03 | 157.07 |
| 2 | fused_28_rot_240.pdb | NH | 2.02 | 158.16 |
| 3 | fused_78_rot_300.pdb | NH | 2.02 | 158.18 |


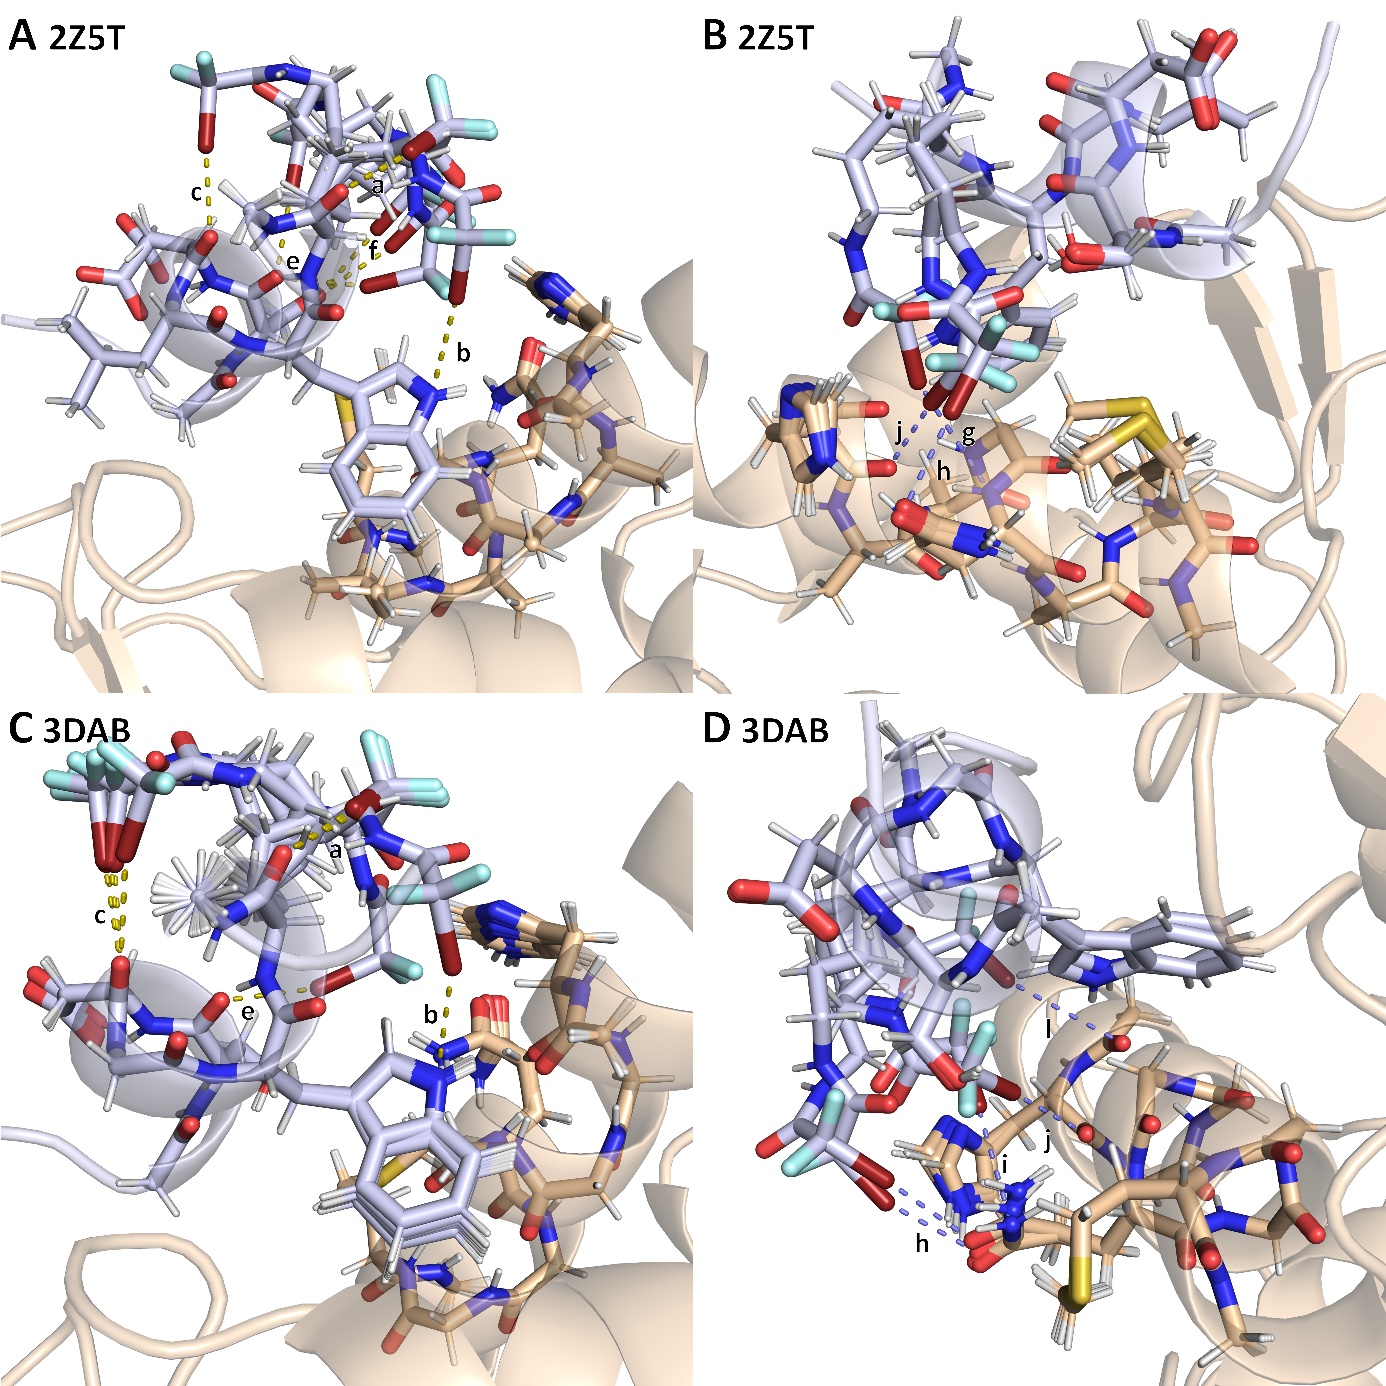
**Figure S3.** SC: Side chain; BB: Backbone. Final conformations after geometry optimization with Lys24Nle(εNHCOCF2Br) in modified crystal structures of PDB IDs 2Z5T and 3DAB. Mdm4 protein in beige. 15-29p53 peptide in light blue. **A**, 2Z5T: 13 intramolecular XBs of the peptide not targeting the side chain of Asp21. Four XBs directed toward Asp21-BB (c) and four toward Lys24-BB (a) each have nearly identical geometry. **B**, 2Z5T: Three XBs aimed against the protein, but not targeting the side chain of His51. **C**, 3DAB: 16 intramolecular XBs of the peptide not targeting the side chain of Asp21. Four XBs directed toward Asp21-BB (c) and four toward Lys24-BB (a) each have nearly identical geometry. **D**, 3DAB: Five XBs aimed against the protein, but not targeting the side chain of His54.


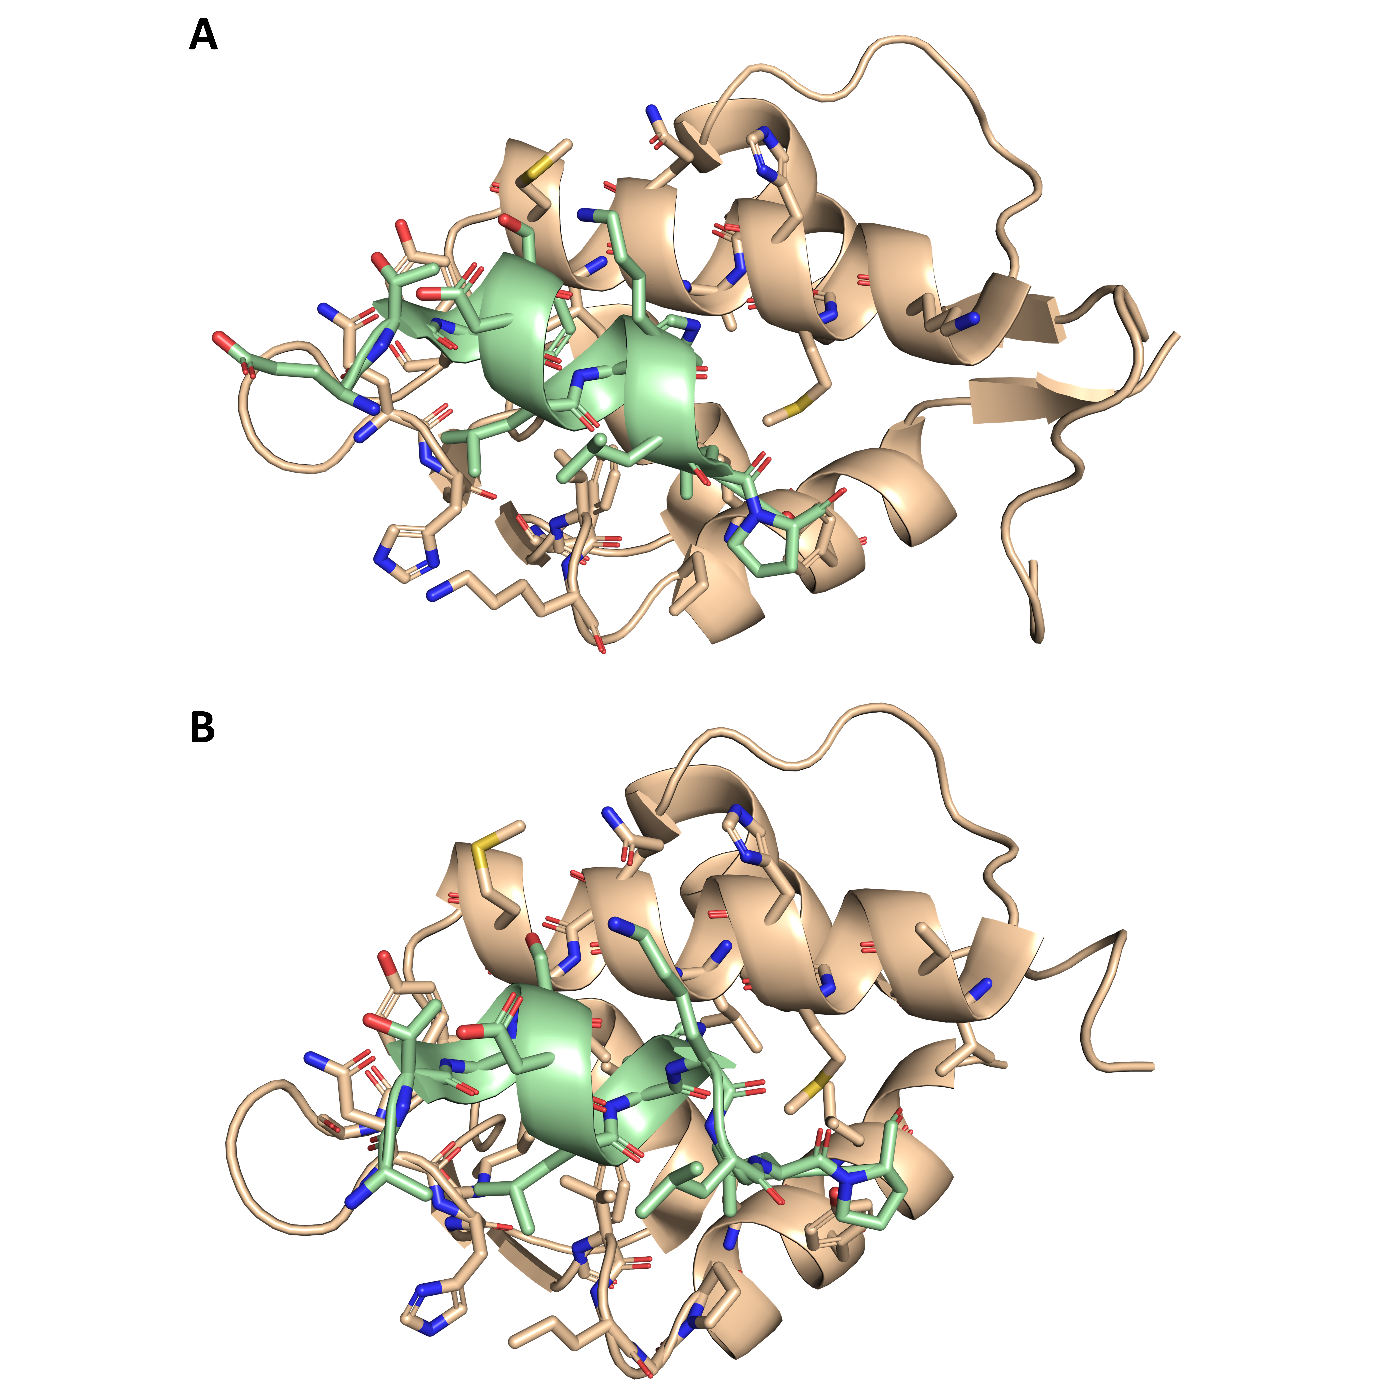
**Figure S4.** All amino acids within 12 Å around Lys24 of 15-29p53 peptide chains are depicted as sticks. Protein in beige, peptide in green. **A**,Overview of chain E (Mdm4) and chain F (15-29p53 peptide) in 2Z5T. **B**, Overview of chain C (Mdm4) and chain D (15-29p53 peptide) in 3DAB.
